1 **Comparative metagenomics of coalbed methane microbial**  
2 **communities reveals biogenic methane potential in the**  
3 **Appalachian Basin**

4  
5  
6 Daniel E. Ross<sup>1,2</sup>, Daniel Lipus<sup>1,3</sup>, Kelvin B. Gregory<sup>4</sup>, and Djuna Gulliver<sup>1\*</sup>

7  
8  
9 <sup>1</sup>Research and Innovation Center, National Energy Technology Laboratory,  
10 Pittsburgh, Pennsylvania, United States.

11  
12 <sup>2</sup>AECOM, Pittsburgh, Pennsylvania, United States.

13  
14 <sup>3</sup>Oak Ridge Institute for Science and Education (ORISE), Oak Ridge, Tennessee.

15  
16 <sup>4</sup>Department of Civil and Environmental Engineering, Carnegie Mellon University,  
17 Pittsburgh, Pennsylvania, United States

18  
19 \*Corresponding author: [djuna.gulliver@netl.doe.gov](mailto:djuna.gulliver@netl.doe.gov)  
20  
21  
22

23 **Natural gas is a major source of global energy, and a large fraction is**  
24 **generated in subsurface coalbed deposits. Microbial communities within**  
25 **coalbed deposits impact methane production, and as a result contribute to**  
26 **global carbon cycling. The process of biogenic coal-to-methane conversion**  
27 **is not well understood. Here we demonstrate the first read- and assembly-**  
28 **based metagenome profiling of coal-associated formation waters, resulting**  
29 **in the recovery of over 40 metagenome-assembled genomes (MAGs) from**  
30 **eight individual coalbed methane wells in the Appalachian Basin. The**  
31 **majority of samples contained hydrogenotrophic methanogens, which were**  
32 **present in higher relative abundances than was previously reported for**  
33 **other coalbed basins. The abundance of Archaea and salinity were**  
34 **positively correlated, suggesting that salinity may be a controlling factor**  
35 **for biogenic coalbed methane. Low-abundance coalbed microbial**  
36 **populations were functionally diverse, while the most dominant organisms**  
37 **exhibit a high degree of genomic and functional similarities. Basin-specific**  
38 **pan-metagenome clustering suggests lower abundant and diverse bacterial**  
39 **communities are shaped by local basin parameters. Our analyses show**  
40 **Appalachian Basin coalbed microbial communities encode for the potential**  
41 **to convert coal into methane, which may be used as an indicator of**  
42 **potential biogenic methane production for future well performance and**  
43 **increased well longevity.**

44

45 Methane is an important fossil energy resource in the global energy landscape.  
46 As conventional natural gas resources become depleted, unconventional gas  
47 technologies will emerge with greater importance for global energy security. One  
48 unconventional gas technology is coalbed methane (CBM), which relies on  
49 underutilized natural methane repositories trapped in subsurface coalbeds. CBM  
50 wells provide access to subsurface methane deposits at a reduced cost and  
51 environmental impact relative to traditional mining practices <sup>1</sup>.

52 An estimated 40% of U.S.-based CBM is biogenic<sup>2,3</sup>, and recently, there  
53 has been a growing interest in understanding microbial communities in coalbed  
54 deposits, as these communities may be potential indicators of productive CBM  
55 wells or utilized to enhance *in situ* production of methane.<sup>4</sup> Research in this area  
56 has offered insight into unique subsurface microbial pathways that affect  
57 methane production and ultimately, the global energy supply and global carbon  
58 cycling. Biological conversion of coal to methane is complex and requires  
59 multiple enzymatic steps, performed by a diverse set of microorganisms,  
60 including hydrocarbon degraders and methanogens<sup>5</sup>—unraveling these  
61 pathways, and the associated diverse community of microorganisms, is  
62 paramount to understanding biogenic methane production.

63 Much of what is known about coalbed microbial communities has been  
64 derived from 16S rRNA gene sequencing<sup>6-8</sup>, which provides important  
65 information about microbial community structure and diversity, but lacks  
66 functional data required for detailed metagenomic analyses. A limited number of  
67 studies have provided valuable insight into the metabolic potential of CBM

68 systems using metagenomics<sup>9,10</sup>. However, these studies are limited to the  
69 western (Alberta Basin, Powder River Basin, and the San Juan Basin) and  
70 interior basins (Illinois Basin), neglecting large coalbed basins in the eastern  
71 United States, specifically the Appalachian Basin. The Appalachian Basin is an  
72 energy rich expanse that stretches from New York to Alabama and according to  
73 the newest EIA report is one of the most productive energy regions in the nation  
74 ([www.eia.gov](http://www.eia.gov)).

75 To characterize the unknown microbial community in the eastern US coal  
76 basin and gain insight in its potential for biogenic methane production, we  
77 present the first metagenomic investigation of Appalachian Basin coalbeds and  
78 the first coalbed-focused pan-genomic comparison across geographically distinct  
79 regions. Findings from this study provide 1) a read-based and assembly-centric  
80 taxonomic profiling of the previously uncharacterized microbial communities, 2)  
81 the first Appalachian Basin coalbed metagenome-assembled genomes (MAGs),  
82 3) functional potential characterization of coalbed microbial communities extant in  
83 the Appalachian Basin, and 4) a taxonomic and functional comparison of  
84 Appalachian Basin metagenomes to microbial communities from geographically  
85 distinct coalbeds. Our results demonstrate the Appalachian Basin to be distinct  
86 from previously characterized basins, specifically an abundance of  
87 hydrogenotrophic methanogens from the Order *Methanomicrobiales*, suggesting  
88 a novel subsurface environment that could be targeted for methane production  
89 and contributes to unknown amounts of carbon cycling. We show abundant  
90 populations were highly conserved across geographically distinct coalbed basins

91 while low-abundance microorganisms were functionally diverse within and across  
92 coal basins. This work provides a framework for understanding subsurface  
93 microbial metabolisms and the potential for coal to methane conversion, which  
94 can be utilized as an indicator for the potential to recover methane from unmined  
95 areas, and enable the development for microbial enhanced coalbed methane  
96 strategies in the Appalachian Basin.

97

98 **METHODS**

99

100 **Sample collection and chemical characterization.** Formation water samples  
101 (*i.e.*, water from CBM wells produced after drilling) were collected from eight  
102 separate coalbed methane wells from the Appalachian Basin. Samples were  
103 extracted from CBM wells named Key8, Key7, K34, K35, P21, BB137, MC79,  
104 and L32A, at a depth of 796 ft., 1,201 ft., 1,704 ft., 1,912 ft., 1,961 ft., 1,980 ft.,  
105 2,239 ft., and 2,578 ft., respectively. All samples were obtained from the  
106 Pocahontas 3 coal seam in December 2015 (Buchanan County, VA; Tazewell  
107 County, VA; McDowell County, WV) with the exception of Key8 (Middle  
108 Kittanning) and Key7 (Upper Kittanning/Brookville “A”), which came from Indiana  
109 County, PA and Westmoreland County, PA, respectively. Formation water  
110 samples were collected in sterile 1L bottles, placed on ice (immediately following  
111 extraction from the well), and frozen upon arrival at NETL. The coal rank  
112 associated with production water ranged from low/medium volatile bituminous  
113 (K34, K35, P21, BB137, MC79, and L32A) to medium/high volatile bituminous  
114 (Key7 and Key8). Cumulative Appalachian Basin coalbed methane production  
115 ranged from 10 billion cubic feet (BCF) to 1 trillion cubic feet<sup>11</sup>.

116

117 Major and trace cations and anions (Na, Ca, Mg, K, Fe, Sr, Ba, Li, Mn, and Cl)  
118 were examined at the Pittsburgh Analytical Laboratory (National Energy  
119 Technology Laboratory) following EPA methods 6010C and 300.1 using ICP-  
120 OES (Perkin Elmer Optima 7300 DV) and IC (Dionex Ion Chromatograph).  
121 Samples were run in duplicate, with average values being recorded  
122 (Supplementary Table 1).

123

124 **Read-based microbial abundance correlation.** Read-based taxonomy  
125 (Archaea and Bacteria relative abundance) was correlated to major and minor  
126 cation/anion concentrations with Spearman rank coefficients using *vegan* in  
127 R<sup>12,13</sup>.

128

129 **DNA extraction, metagenome sequencing, and assembly.** Aliquots of  
130 formation water (50 mL) were filtered through a 0.2  $\mu$ m filter and DNA was  
131 extracted from the filter using the MoBio PowerSoil or PowerWater DNA Isolation  
132 Kits (Carlsbad, CA). For shotgun metagenome sequencing, DNA libraries were  
133 prepared using the Nextera XT DNA Library Preparation Kit according to  
134 manufacturer's protocol (Illumina, San Diego, CA). Paired-end sequencing reads  
135 (2 x 300 bp) were generated on an Illumina MiSeq with the MiSeq v3 Reagent Kit  
136 (600 cycles) (Illumina, San Diego, CA). Initial assessment of reads was  
137 performed with Kaiju using default settings: *nr* reference database, no SEG low  
138 complexity filter, greedy run mode, minimum match length = 11, minimum match

139 score = 70, and allowed mismatches = 5<sup>14</sup>; MG-RAST<sup>15</sup>; GraftM  
140 (<https://github.com/geronimp/graffM>); and Phylopythia (Supplementary Table  
141 2)<sup>16</sup>. Paired end reads were assembled using metaSPAdes version 3.8.0<sup>17</sup> with  
142 error correction and with k-mer values of 33, 55, and 77. Assembly quality  
143 metrics (e.g., GC-content, N50, number of contigs, longest contig) were  
144 assessed using QUAST<sup>18</sup> (Supplementary Table 3; Supplementary Figure 1).  
145 Percentage of reads mapping to metagenome contigs was performed with the  
146 'map reads to contigs' tool in the CLC Genomics Workbench version 8.5.1 (CLC  
147 Bio, Aarhus, Denmark). Annotation of assembled metagenome contigs was  
148 performed with PROKKA<sup>19</sup> and MG-RAST<sup>15</sup>.

149 Contigs generated from metagenome assembly were binned using  
150 reference-independent methods (VizBin<sup>20</sup>). Completeness of metagenome-  
151 assembled genomes (MAGs) was assessed with CheckM, using single-copy  
152 marker genes<sup>21</sup>. The lineage\_wf was initially employed, and combined with  
153 BLASTn and Phylopythia outputs to further interrogate MAG quality using the  
154 user-defined taxonomy\_wf. For example, bins defined at the phylum level (e.g.,  
155 *Euryarchaeota*) using the lineage\_wf were analyzed further and based upon  
156 sequence similarity to *Methanocalculus* or *Methanoregula*, order-level  
157 taxonomy\_wf was used to assess completeness and contamination using the  
158 *Methanomicrobiales* marker gene set. MAGs generated from contig binning were  
159 annotated using the RAST annotation server<sup>22</sup> and PROKKA<sup>19</sup>. Manual curation  
160 of MAGs was performed using output from CheckM and RAST. Quality  
161 designation for metagenome assembled genomes (MAGs) or population  
162 genomes was based upon metagenome-assembled genome (MIMAG)<sup>23</sup>  
163 standards developed by the Genomic Standards Consortium (GSC), with high-  
164 quality draft genomes having >90% completion, <5% contamination, with 23S,  
165 16S, and 5S rRNA genes and >18 tRNAs. Medium-quality draft genomes were  
166 characterized by having >50% completion, and <10% contamination, while low-  
167 quality draft genomes were <50% complete and <10% contamination.

168 DNA sequences for metagenome samples from the San Juan basin (CG7,  
169 CG8, CG13, and CG19) and Alberta Basin (CO182, CO183, and Trident1560D)  
170 were downloaded from the Hydrocarbon Metagenomics Project (HMP) database  
171 (<http://hmp.ucalgary.ca/HMP/>). Full details of sample collection, DNA extraction,  
172 and sequencing can be found online (<http://hmp.ucalgary.ca/HMP/>) and has been  
173 documented by An and coworkers<sup>9</sup>. Raw read statistics are shown in  
174 Supplementary Table 4 and 5. Metagenomes can also be found at the  
175 metagenomics analysis server (MG-RAST) under the Hydrocarbon  
176 Metagenomics Project (mgp2360). Produced water samples CG7, CG8, CG13,  
177 and CG19 from the San Juan Basin, and Trident1560D from the Alberta Basin

178 were sequenced using 454-pyrosequencing. Samples CO182 and CO183 from  
179 the Alberta Basin were sequenced with Illumina.

180 Average nucleotide identity (ANI) and average amino acid identity (AAI)  
181 were calculated with the enveomics collection toolbox<sup>24,25</sup>.

182

183 **Pan-metagenome analysis.** Pan-metagenomics was performed with the  
184 Bacterial Pan Genome Analysis Tool (BPGA) version 1.0.0<sup>26</sup>. Default BPGA  
185 parameters were employed, which included USEARCH clustering at 50%  
186 sequence identity cutoff<sup>27</sup>.

187

188 **Data availability.** The datasets generated during and/or analyzed during the  
189 current study are available on the Energy Data Exchange (EDX) page  
190 ([https://edx.netl.doe.gov/dataset/appalachian-basin-metagenome-sequencing-  
191 reads](https://edx.netl.doe.gov/dataset/appalachian-basin-metagenome-sequencing-reads)).

192



## 193 **RESULTS**

### 194 **Read-based taxonomy and functional profiling of Appalachian Basin** 195 **formation water metagenomes.**

196 Formation water collected from eight separate coalbed methane wells was  
197 utilized for metagenomic analysis and geochemical characterization. Taxonomic  
198 profiling of metagenome reads revealed that Appalachian Basin metagenomes  
199 contained varied proportions of Archaea and Bacteria, with the relative  
200 abundance ranging from 1-81%, and 19-99%, respectively (Figure 1). The  
201 relative abundance of Archaea was >48% for five of the eight metagenomes,  
202 greater than what has been found in other coalbed basins<sup>6-8</sup>, but similar to  
203 Archaea abundances in crude oil reservoirs<sup>28</sup>.

204 Environmental factors, such as salinity, coal rank, and depth, are known to  
205 play a key role in shaping the taxonomic distribution of subsurface microbial  
206 communities<sup>10,29-31</sup>. Coalbed-associated formation water geochemistry was  
207 examined and varied from moderately to highly saline, with concentrations of  
208 major ions (Na, Cl, Mg, and Ca) ranging from 7.29 g/L (Key8) to 130.30 g/L  
209 (K34), (Figure 1; Supplementary Table 2). There was a positive correlation  
210 between Archaea abundances and salinity and a negative correlation between  
211 Bacteria abundances and salinity (Figure 1, Supplemental Table 2) in the  
212 Appalachian Basin samples. No observable trends were found between microbial  
213 community composition and associated coal rank (*i.e.*, maturity) or depth.

214 Utilization of coal as a carbon and energy source requires breakdown of  
215 complex polymers into fermentable substrates, a poorly understood process and

216 hypothesized to be the rate-limiting step in the conversion of coal to methane<sup>5</sup>. It  
217 is thought that hydrocarbon-activating organisms (e.g., Deltaproteobacteria and  
218 Firmicutes) are responsible for the initial attack on coal<sup>32</sup>. Examination of  
219 metagenome reads revealed the presence of hydrocarbon degradation pathways  
220 in all samples, though samples containing a higher abundance of Bacteria-  
221 specific sequences had a higher proportion of hydrocarbon degradation  
222 pathways (Figure 1; Supplementary File 1).

223 Samples containing an abundance of Bacteria-specific reads were  
224 predominantly comprised of Proteobacteria and despite phylum-level similarities  
225 across Appalachian Basin metagenomes, noteworthy distinctions were apparent  
226 at the class level. For example, metagenome L32A contained mostly  
227 Alphaproteobacteria (14%), metagenomes K35 and MC79 were comprised  
228 predominantly of Gammaproteobacteria (52% and 46% *Pseudomonas*,  
229 respectively), and Key8 was comprised predominantly of Deltaproteobacteria  
230 (22% *Desulfobacterium*) (Figure 2). Within the Proteobacteria phylum,  
231 Alphaproteobacteria and Deltaproteobacteria were most diverse across  
232 Appalachian Basin samples, while Betaproteobacteria, Gammaproteobacteria,  
233 and Epsilonproteobacteria were predominantly comprised of Burkholderiales,  
234 Pseudomonadales or Alteromonadales, and Campylobacterales, respectively.  
235 Four of the eight metagenomes containing the lowest relative abundances of  
236 Bacteria (<40%) had a higher proportion of members from the Terrabacteria  
237 group (Firmicutes, Chloroflexi, and Actinobacteria), FCB group (Bacteroidetes),  
238 and Synergistales.

239 Closer examination of Archaea-specific reads revealed a predominance of  
240 Methanomicrobiales in the majority of Appalachian Basin samples, with relative  
241 abundances reaching 69% (Figure 2). Members of the order  
242 Methanomicrobiales are hydrogenotrophic methanogens that utilize H<sub>2</sub>/CO<sub>2</sub> and  
243 formate, and inhabit a variety of environments, including marine and freshwater  
244 sediments<sup>33</sup>, and coalbed environments across the United States and  
245 abroad<sup>6,7,34</sup>. Other less-abundant Archaea orders represented in metagenome  
246 samples included Methanobacteriales and Methanosarcinales (Figure 2).

247

## 248 **Reconstruction of Appalachian Basin metagenome-assembled genomes** 249 **(MAGs)**

250 Assembly-based metagenome profiling was performed to obtain genome-  
251 resolved metabolisms of eight coalbed-associated microbial communities.  
252 Approximately 40 medium- to high-quality MAGs were recovered, with 77-94% of  
253 reads mapping to the metagenome assembled contigs. From the most abundant  
254 taxa we recovered ten Methanomicrobiales (*Methanocalculus* and  
255 *Methanoregula*), four Gammaproteobacteria (*Pseudomonas* and *Shewanella*),  
256 and two Deltaproteobacteria (*Desulfobacteraceae* and *Desulfobulbaceae*)  
257 population genomes (Supplementary Table 7).

258 **Methanomicrobiales.** Of the ten Methanomicrobiales MAGs, six were  
259 most closely related to halotolerant and hydrogenotrophic methanogens from  
260 hydrocarbon resource environments (oil reservoirs)—specifically,  
261 *Methanocalculus* sp. 52\_23, *Methanomicrobiales* archaeon 53\_18, and

262 *Methanocalculus halotolerans* (Supplementary Figure 2-4). Four were most  
263 closely related to *Methanoregula formicum* (Supplementary Table 8;  
264 Supplementary Figure 2-5).

265 Methanomicrobiales MAGs were highly similar, with ANI and AAI values  
266 >95%, suggesting that five of the six *Methanocalculus* MAGs belong to the same  
267 species, and three of the four *Methanoregula* MAGs belong to the same species  
268 (Supplementary Table 8). While samples contain acetoclastic methanogens, the  
269 predominance of Methanomicrobiales suggests hydrogenotrophic  
270 methanogenesis is operative in Appalachian Basin (Figure 2). Furthermore,  
271 acetoclastic methanogenesis may be inhibited by coal degradation products,  
272 which are similar in composition to crude oil, and contain substances that may  
273 interfere with this microbial metabolism<sup>35</sup>.

274 Following assembly and manual curation of *Methanomicrobiales* MAGs,  
275 comparative genomics was performed on the six *Methanocalculus* population  
276 genome bins (Supplementary Figure 5) to identify the functional similarities of the  
277 predominant methanogens across the Appalachian Basin. The core genome  
278 (predicted protein sequences common among all genomes examined) contained  
279 1583 gene families (representing 44% of the total gene families) with 69% of the  
280 representative sequences most closely related to *Methanocalculus* sp. 52\_23,  
281 22% most closely related to *Methanomicrobiales*, 2.3% most closely related to  
282 *Methanoculleus*, and 1.4% most closely related to *Methanoregula*. Analysis of  
283 the *Methanocalculus* core genome revealed complete pathways for carbon  
284 fixation (reductive pentose phosphate cycle, and incomplete reductive citrate

285 cycle), methane metabolism [methanogenesis (CO<sub>2</sub> to methane, and acetate to  
286 methane), F420 biosynthesis, and acetyl-CoA pathway (CO<sub>2</sub> to acetyl-CoA)],  
287 branched chain amino acid metabolism, ATP synthesis (V-type ATPase), and  
288 transport systems (molybdate, tungstate, glycine betaine/proline,  
289 osmoprotectant, phosphate, iron, zinc, cobalt/nickel, and lipooligosaccharide)  
290 (Supplementary File 2 and 3).

291 **Gammaproteobacteria.** Four MAGs related to Gammaproteobacteria  
292 were recovered from metagenomes K35 and Key8 (*Pseudomonas stutzeri*), and  
293 MC79 (*Shewanella putrefaciens*, and *Pseudomonas libanensis*). *Pseudomonas*  
294 sp. K35 and *Pseudomonas* sp. Key8 are high-quality population genomes with a  
295 high degree of similarity to one another (ANI = 97.88%), and most closely related  
296 to *Pseudomonas stutzeri* CCUG29243<sup>36</sup>. Prior work has described a high  
297 abundance of *Pseudomonas* in coalbed systems<sup>9,10,37,38</sup>.

298 Formation water from wells Key8 and K35 were moderately saline (7-18  
299 g/L). One mechanism of salinity tolerance employed by bacteria involves  
300 production of compatible solutes to maintain turgor pressure and water content  
301 within the cell<sup>39</sup>. *Pseudomonas* sp. K35 and *P.* sp. Key8 genomes contain the  
302 *ectABCD-ask* gene cluster, which encodes for biosynthesis of the compatible  
303 solute, hydroxyectoine<sup>40</sup>.

304 *Pseudomonas* may play an important role in coal solubilization as many  
305 *pseudomonads* have been reported to produce a variety of rhamnolipids—  
306 surface-active agents (surfactants) with the ability to solubilize hydrophobic  
307 carbon sources<sup>41–43</sup>. Production of rhamnolipids is controlled by many factors,

308 including temperature, salinity, pH, and nutrient availability<sup>43,44</sup> and may be  
309 induced by coal or coal substituents<sup>42</sup>. Both *Pseudomonas* sp. K35 and Key8  
310 genomes contain the *rmIBDAC* operon for l-rhamnose biosynthesis  
311 (Supplemental Text), suggesting a potential for rhamnolipid-mediated coal  
312 solubilization in the Appalachian Basin. The solubilized coal constituents may be  
313 utilized directly by *Pseudomonas* or may provide fermentative substrates for  
314 other community members<sup>5</sup>.

315 Polycyclic aromatic hydrocarbons (PAHs) are a major constituent in  
316 coalbed production water and PAH-degrading microorganisms are prevalent in  
317 coal reservoirs<sup>38,45</sup>. *Pseudomonas* sp. K35 encodes for the upper and lower  
318 naphthalene degradation pathways and has the potential to degrade PAHs<sup>36</sup>.  
319 While we did not find naphthalene degradation pathways in *Pseudomonas* sp.  
320 Key8, other community members in the Key8 metagenome could perform this  
321 function, as the Key8 metagenome encodes for hydrocarbon degradation  
322 pathways (Supplementary File 1).

323 The other abundant Gammaproteobacteria genome bin was most closely  
324 related to *Shewanella*, with ~17% of metagenome reads mapping to the genome  
325 bin. The *Shewanella* population genome was 96% complete, and based on  
326 whole genome comparisons, was most closely related to *Shewanella*  
327 *putrefaciens* (ANI = 98.57%) (Supplementary Text, Supplementary Table 7). The  
328 genus *Shewanella* contains metabolically versatile facultative anaerobes best  
329 known for the dissimilatory reduction of metals (e.g. iron, manganese, and  
330 elemental sulfur)<sup>46</sup> and *Shewanella* spp. have been isolated from coal

331 environments<sup>47</sup>. The Appalachian Basin coalbed *Shewanella* population genome  
332 bin encoded for genes involved in assimilatory sulfate reduction, c-type  
333 cytochrome biogenesis (required for heme proteins involved in dissimilatory iron  
334 and manganese reduction), and nitrate reduction (Supplemental Text).

335       **Deltaproteobacteria.** Deltaproteobacteria were predominant in  
336 metagenome Key8, which contained two population genome bins related to  
337 *Desulfobacteraceae* and *Desulfobulbaceae*. While population genome bins could  
338 only be resolved to the family level, recovery of 16S rRNA genes from  
339 metagenome assemblies revealed the presence of near-complete sequences  
340 related to *Desulfocapsa sulfexigens*, *Desulfobacula toluolea*, and an Uncultured  
341 *Desulfobacterium*. Both families (*Desulfobacteraceae* and *Desulfobulbaceae*)  
342 contain known sulfate reducers, and annotation of the genome bins revealed the  
343 metabolic potential for sulfate, sulfite, and sulfur reduction (Supplementary Text).  
344 The presence of Deltaproteobacteria in metagenome Key8 combined with the  
345 fact that produced water from Key8 was the only sample with significant amounts  
346 of sulfate (1.45 g/L) (Supplementary Table 5), suggests that these  
347 microorganisms may play a role in generating or removing sulfate.

348       **Low abundance bins.** Population genome bins from lower abundant taxa  
349 were recovered and include Alphaproteobacteria (*Roseovarius*, *Marinovum*,  
350 *Rhizobium*, and *Hyphomonas*), Clostridia (*Acetobacterium*), Methanomicrobia  
351 (*Methanosaeta* and *Methanospirillum*), Gammaproteobacteria (*Marinobacter*),  
352 and Epsilonproteobacteria (*Arcobacter* and *Sulfurospirillum*). In general,  
353 Alphaproteobacteria are capable of aromatic compound degradation and

354 fermentation, and may provide the necessary substrates for methanogenesis<sup>5,48</sup>;  
355 The *Roseovarius* and *Hyphomonas* MAGs weren't well resolved but contained  
356 fragments of aromatic hydrocarbon degradation pathways (Supplemental Text);  
357 *Acetobacterium* has previously been found in coalbed environments<sup>9,10</sup>, and is an  
358 acetogen capable of CO<sub>2</sub> fixation using the Wood-Ljungdahl pathway  
359 (Supplemental Text)<sup>49</sup>; *Methanosaeta* spp. are acetoclastic methanogens that  
360 utilize acetate for methanogenesis; and *Marinobacter* has been found in  
361 hypersaline subsurface environments and degrade alkanes, BTEX-N, and  
362 aliphatic compounds (e.g., hexadecane)<sup>50,51</sup>.

363

#### 364 **Intra- and inter-basin assembly-based functional profiling of Appalachian**

#### 365 **Basin metagenomes**

366 Microbial pan-metagenomics was employed to examine the metabolic potential  
367 of the Appalachian Basin metagenomes and the functional intra-basin  
368 similarities. The functional relatedness of metagenomes (core metagenome)  
369 describes the pathways and potential driving factors common in coal  
370 environments, while the functional dissimilarity (accessory and unique  
371 metagenome) provides insight into how microbial communities are shaped by  
372 site-specific physicochemical factors. Analysis of protein sequences predicted  
373 from metagenome-assembled DNA contigs across all eight coalbed methane  
374 metagenomes, revealed a total of 429,800 predicted genes for the Appalachian  
375 Basin pan-metagenome. Genes were grouped into functional protein families  
376 based upon sequence identity (50% identity cutoff) yielding 329,564 total gene



377 families, 52,470 accessory gene clusters, 276,720 unique gene clusters, and 374  
378 core gene clusters (Supplementary Table 9).

379 The core metagenome of the Appalachian Basin represented 0.11% of the  
380 pan-metagenome, suggesting high diversity amongst microbial communities  
381 within the Appalachian coal basin. The diversity of microbial communities may be  
382 a direct result of the inherent complexity and heterogeneity of coalbed systems.  
383 Structurally coal seams are comprised of a cleat system connecting small pore  
384 spaces (<50 nm in diameter) and depending on the coal rank, have low  
385 permeability. Thus the physicochemical properties of coalbeds create micro-  
386 niches where microbial communities become physically separated and evolve  
387 into functionally distinct entities.

388 Annotation of the core genome revealed sequences were predominantly  
389 related to Methanomicrobiales (*Methanocalculus*, *Methanoregula*, and  
390 *Methanoculleus*). Other core metagenome sequences were most closely related  
391 to Methanobacteriales, Methanosarcinales, Desulfovibrionales and  
392 Pseudomonadales (Supplementary Table 10). Specifically, conserved pathways  
393 included hydrogenotrophic and acetoclastic methanogenesis, amino acid  
394 biosynthesis, and oxidative stress. Therefore, while nutrient limitation and coal  
395 heterogeneity may contribute to taxonomic and functional diversity of coal-  
396 degrading microorganisms, homogeneity of coal-degradation products (e.g.,  
397 intermediates for methanogenesis) may play a role in the conservation of the  
398 aforementioned pathways (core metagenome).

399           The functional relatedness of Appalachian Basin metagenomes to other  
400 coalbed basins was also examined using pan-metagenomics. Analyses were  
401 aimed at determining how functionally related microbial communities from distinct  
402 coalbed methane wells were, and how that might infer biogenic methane  
403 production in coal from various basins. In total, fifteen metagenomes from three  
404 geographically distinct coalbed basins (three from the Alberta Basin, eight from  
405 the Appalachian Basin, and four from the San Juan Basin) were analyzed. A total  
406 of 429,182 gene clusters (pan-metagenome) were identified—23 gene families  
407 were common to all metagenomes (core metagenome), 353,745 were specific to  
408 an individual metagenome (unique metagenome), and 75,414 were found in at  
409 least one but not all metagenomes (accessory metagenome) (Supplementary  
410 Table 9).

411           Pan-metagenome clustering (taking into account all predicted protein  
412 sequences) of the Alberta, Appalachian, and San Juan Basin samples revealed  
413 basin-specific grouping (Figure 2), suggesting the overall metabolic potential is  
414 shaped by conditions unique to each coal region. The few exceptions were  
415 metagenome CG7 from the San Juan Basin, metagenome Trident1560D from  
416 the Alberta Basin, and metagenomes L32A and Key8 from the Appalachian  
417 Basin (Figure 2). Specifically, metagenome CG7 clustered with metagenome  
418 Key8 and both contain similar taxonomic distributions of Pseudomonadales,  
419 Clostridiales, and Bacteroidales, with little to no Archaea. The two remaining  
420 metagenomes, Trident1560D and L32A clustered together, and compared to all  
421 other coalbed methane samples contained lower abundances of

422 Betaproteobacteria, and higher abundances of Alphaproteobacteria  
423 (Rhodobacterales and Rhizobiales). The clustering of the outliers appeared to be  
424 driven by the presence or absence of shared taxonomic groups, which is similar  
425 to trends observed by Lawson and coworkers, where habitat-specific taxonomic  
426 distribution was shaped by coal rank and physicochemical conditions exhibiting  
427 'patterns of endemism' in coalbed samples<sup>10</sup>.

428 Core metagenome clustering exhibited less basin-specific groupings, but  
429 like the pan-genomic outlier clusters, aligned with relative abundances and  
430 taxonomic distributions of Bacteria and Archaea (Supplemental Figure 10). For  
431 example, formation water samples containing the highest amounts of Archaea  
432 (Methanomicrobiales) grouped together (Key7, K34, BB137, and P21), as did  
433 metagenomes comprised predominantly of Gammaproteobacteria  
434 (*Pseudomonas*) (K35, CG7, CO182 and CO183). While Basin-specific clustering  
435 in the pan-metagenome demonstrates a strong selecting force in conditions  
436 unique to each coal region, the core taxonomy-specific metagenome clustering  
437 reveals common pathways that may be taxonomically linked and evolve through  
438 exposure to physicochemical properties common to all coal environments—for  
439 example, coal-degradation products that feed into hydrogenotrophic  
440 methanogenesis pathways.

441 The multi-basin core metagenome contained a high proportion of gene  
442 families having KEGG or COG hits to amino acid transport metabolism,  
443 nucleotide metabolism, or xenobiotics degradation and metabolism, suggesting  
444 these pathways may be important in all coalbed environments, especially

445 considering the exposure to hydrocarbons associated with and generated from  
446 coal. Conversely, the unique and accessory gene families were highest in cell  
447 wall/membrane/envelope biogenesis, signal transduction mechanisms, and  
448 metabolism of cofactors and vitamins. Gene families in these functional  
449 categories were presumably abundant due to the predominating physicochemical  
450 properties (impacting environmental stresses and nutrient availability) in the  
451 different basins.

452 Based upon pan-metagenome analysis, the unique gene families were  
453 consistently high ranging from ~78% for the Alberta basin to ~89% for the San  
454 Juan Basin, which suggests coalbed metagenomes contain a high intra-basin  
455 metabolic diversity. These findings support previous metagenomic work in  
456 hydrocarbon resource environments (oil sands, oil fields, and coalbeds), where  
457 coalbed samples were the most diverse<sup>9</sup>.

458

## 459 **DISCUSSION**

460 Taxonomic characterization and pan-genome comparison of Appalachian Basin  
461 coalbed formation water metagenomes, combined with genome-resolved  
462 microbial metabolisms of subsurface coalbed systems, revealed functional  
463 diversity within and across coalbed basins. Specifically, high-abundance  
464 populations (Methanomicrobiales and Pseudomonadales) were highly similar  
465 (low diversity), while low-abundance populations were much more diverse--a  
466 pattern similar to other physicochemically distinct deep-sea hydrothermal vent  
467 microbial communities<sup>52</sup>. The high abundance of Methanomicrobiales suggests

468 ongoing biogenic methane production in Appalachian Basin coalbeds.  
469 Furthermore, the co-occurrence of Methanomicrobiales with high salinity  
470 suggests their adaptation to saline environments. Several samples encoded for  
471 potential hydrocarbon degradation pathways, however the overall number of  
472 genes related to these pathways was limited, especially in Archaea-dominated  
473 samples. Results from this study provide a first insight of the subsurface  
474 metabolisms of Appalachian Basin coalbed microbial communities, and reveal  
475 valuable information on the potential for biogenic coal to methane conversion in  
476 the Appalachian Basin. Additional analyses (e.g., metatranscriptomics,  
477 metaproteomics) of coal cores with associated formation water are needed to  
478 fully assess the real-time dynamics of microbial communities in coalbed systems.  
479

480 **ACKNOWLEDGEMENTS**

481           This technical effort was performed in support of the National Energy  
482 Technology Laboratory's ongoing research under the RES contract DE-  
483 FE0004000.

484 **DISCLAIMER**

485           This report was prepared as an account of work sponsored by an agency  
486 of the United States Government. Neither the United States Government nor any  
487 agency thereof, nor any of their employees, makes any warranty, express or  
488 implied, or assumes any legal liability or responsibility for the accuracy,  
489 completeness, or usefulness of any information, apparatus, product, or process  
490 disclosed, or represents that its use would not infringe privately owned rights.  
491 Reference therein to any specific commercial product, process, or service by  
492 trade name, trademark, manufacturer, or otherwise does not necessarily  
493 constitute or imply its endorsement, recommendation, or favoring by the United  
494 States Government or any agency thereof. The views and opinions of authors  
495 expressed therein do not necessarily state or reflect those of the United States  
496 Government or any agency thereof.

497 **REFERENCES**

498

- 499 1. Rajaram, V., Dutta, S. & Parameswaran, K. *Sustainable mining practices –*  
500 *a global perspectives. Group* (2005). doi:10.1201/9781439834237
- 501 2. Thielemann, T., Cramer, B. & Schippers, A. Coalbed methane in the Ruhr  
502 Basin, Germany: a renewable energy resource? *Org. Geochem.* **35**, 1537–  
503 1549 (2004).
- 504 3. Strapoć, D. *et al.* Biogeochemistry of Microbial Coal-Bed Methane. *Annu.*  
505 *Rev. Earth Planet. Sci.* **39**, 617–656 (2011).
- 506 4. Ritter, D. J. *et al.* Enhanced microbial coalbed methane generation: A  
507 review of research, commercial activity, and remaining challenges. *Int. J.*  
508 *Coal Geol.* **146**, 28–41 (2015).
- 509 5. Jones, E. J. P., Voytek, M. A., Corum, M. D. & Orem, W. H. Stimulation of  
510 Methane Generation from Nonproductive Coal by Addition of Nutrients or a  
511 Microbial Consortium. *Appl. Environ. Microbiol.* **76**, 7013–7022 (2010).
- 512 6. Strapoć, D. *et al.* Methane-Producing Microbial Community in a Coal Bed  
513 of the Illinois Basin. *Appl. Environ. Microbiol.* **74**, 2424–2432 (2008).
- 514 7. Zhang, J., Liang, Y., Pandey, R. & Harpalani, S. Characterizing microbial  
515 communities dedicated for conversion of coal to methane in situ and ex  
516 situ. *Int. J. Coal Geol.* **146**, 145–154 (2015).
- 517 8. Barnhart, E. P. *et al.* Hydrogeochemistry and coal-associated bacterial  
518 populations from a methanogenic coal bed. *Int. J. Coal Geol.* **162**, 14–26  
519 (2016).
- 520 9. An, D. *et al.* Metagenomics of Hydrocarbon Resource Environments  
521 Indicates Aerobic Taxa and Genes to be Unexpectedly Common. *Environ.*  
522 *Sci. Technol.* **47**, 10708–10717 (2013).
- 523 10. Lawson, C. E. *et al.* Patterns of endemism and habitat selection in coalbed  
524 microbial communities. *Appl. Environ. Microbiol.* **81**, 7924–7937 (2015).
- 525 11. Milici, R. C. & Polyak, D. E. *Coalbed-methane production in the*  
526 *Appalachian basin: Chapter G.2 in Coal and petroleum resources in the*  
527 *Appalachian basin: distribution, geologic framework, and geochemical*  
528 *character. Professional Paper* (2014). doi:10.3133/pp1708G.2
- 529 12. Oksanen, J. *et al.* *Vegan: Community Ecology Package. R Package*  
530 *Version. 2.0-10. CRAN* (2013).
- 531 13. Team, R. C. R: A language and environment for statistical computing. *R*  
532 *Foundation for Statistical Computing* (2014).
- 533 14. Menzel, P., Ng, K. L. & Krogh, A. Fast and sensitive taxonomic  
534 classification for metagenomics with Kaiju. *Nat. Commun.* **7**, 11257 (2016).
- 535 15. Keegan, K. P., Glass, E. M. & Meyer, F. in *Microbial Environmental*  
536 *Genomics (MEG)* (eds. Martin, F. & Uroz, S.) 207–233 (Humana Press,  
537 New York, NY, 2016). doi:[https://doi.org/10.1007/978-1-4939-3369-3\\_13](https://doi.org/10.1007/978-1-4939-3369-3_13)
- 538 16. Gregor, I., Dröge, J., Schirmer, M., Quince, C. & McHardy, A. C.  
539 PhyloPythiaS+: a self-training method for the rapid reconstruction of low-  
540 ranking taxonomic bins from metagenomes. *PeerJ* **4**, e1603 (2016).
- 541 17. Nurk, S., Meleshko, D., Korobeynikov, A. & Pevzner, P. A. metaSPAdes: a  
542 new versatile metagenomic assembler. *Genome Res.* **27**, 824–834 (2017).

- 543 18. Gurevich, A., Saveliev, V., Vyahhi, N. & Tesler, G. QUASt: quality  
544 assessment tool for genome assemblies. *Bioinformatics* **29**, 1072–1075  
545 (2013).
- 546 19. Seemann, T. Prokka: rapid prokaryotic genome annotation. *Bioinformatics*  
547 **30**, 2068–2069 (2014).
- 548 20. Laczny, C. C. *et al.* VizBin - an application for reference-independent  
549 visualization and human-augmented binning of metagenomic data.  
550 *Microbiome* **3**, 1 (2015).
- 551 21. Parks, D. H., Imelfort, M., Skennerton, C. T., Hugenholtz, P. & Tyson, G.  
552 W. CheckM: assessing the quality of microbial genomes recovered from  
553 isolates, single cells, and metagenomes. *Genome Res.* **25**, 1043–1055  
554 (2015).
- 555 22. Aziz, R. K. *et al.* The RAST Server: rapid annotations using subsystems  
556 technology. *BMC Genomics* **9**, 75 (2008).
- 557 23. Bowers, R. M. *et al.* Minimum information about a single amplified genome  
558 (MISAG) and a metagenome-assembled genome (MIMAG) of bacteria and  
559 archaea. *Nat. Biotechnol.* **35**, 725–731 (2017).
- 560 24. Goris, J. *et al.* DNA-DNA hybridization values and their relationship to  
561 whole-genome sequence similarities. *Int. J. Syst. Evol. Microbiol.* **57**, 81–  
562 91 (2007).
- 563 25. Rodriguez-R, L. M. & Konstantinidis, K. T. The enveomics collection: a  
564 toolbox for specialized analyses of microbial genomes and metagenomes.  
565 *PeerJ Prepr.* **4**, e1900v1 (2016).
- 566 26. Chaudhari, N. M., Gupta, V. K. & Dutta, C. BPGA- an ultra-fast pan-  
567 genome analysis pipeline. *Sci. Rep.* **6**, 24373 (2016).
- 568 27. Edgar, R. C. Search and clustering orders of magnitude faster than  
569 BLAST. *Bioinformatics* **26**, 2460–2461 (2010).
- 570 28. Shelton, J. L. *et al.* Environmental Drivers of Differences in Microbial  
571 Community Structure in Crude Oil Reservoirs across a Methanogenic  
572 Gradient. *Front. Microbiol.* **7**, 1535 (2016).
- 573 29. Morrissey, E. M. & Franklin, R. B. Evolutionary history influences the  
574 salinity preference of bacterial taxa in wetland soils. *Frontiers in*  
575 *Microbiology* **6**, 1013 (2015).
- 576 30. Lozupone, C. A. & Knight, R. Global patterns in bacterial diversity. *Proc.*  
577 *Natl. Acad. Sci. U. S. A.* **104**, 11436–11440 (2007).
- 578 31. Hoehler, T., Gunsalus, R. P. & McInerney, M. J. in *Handbook of*  
579 *Hydrocarbon and Lipid Microbiology* (ed. Timmis, K. N.) 635–654 (Springer  
580 Berlin Heidelberg, 2010). doi:10.1007/978-3-540-77587-4\_51
- 581 32. Kleinstaub, S., Schleinitz, K. M. & Vogt, C. Key players and team play:  
582 Anaerobic microbial communities in hydrocarbon-contaminated aquifers.  
583 *Applied Microbiology and Biotechnology* **94**, 851–873 (2012).
- 584 33. Liu, Y. & Whitman, W. B. Metabolic, phylogenetic, and ecological diversity  
585 of the methanogenic archaea. *Ann. N. Y. Acad. Sci.* **1125**, 171–189 (2008).
- 586 34. Gallagher, L. K. *et al.* The effect of coal oxidation on methane production  
587 and microbial community structure in Powder River Basin coal. *Int. J. Coal*  
588 *Geol.* **115**, 71–78 (2013).



- 589 35. Bekins, Godsy & Warren. Distribution of Microbial Physiologic Types in an  
590 Aquifer Contaminated by Crude Oil. *Microb. Ecol.* **37**, 263–275 (1999).
- 591 36. Ross, D. E. & Gulliver, D. Reconstruction of a Nearly Complete  
592 *Pseudomonas* Draft Genome Sequence from a Coalbed Methane-  
593 Produced Water Metagenome. *Genome Announc.* **4**, (2016).
- 594 37. Li, D., Hendry, P. & Faiz, M. A survey of the microbial populations in some  
595 Australian coalbed methane reservoirs. *Int. J. Coal Geol.* **76**, 14–24 (2008).
- 596 38. Penner, T. J., Foght, J. M. & Budwill, K. Microbial diversity of western  
597 Canadian subsurface coal beds and methanogenic coal enrichment  
598 cultures. *Int. J. Coal Geol.* **82**, 81–93 (2010).
- 599 39. Stoveken, N. *et al.* A specialized aspartokinase enhances the biosynthesis  
600 of the osmoprotectants ectoine and hydroxyectoine in *Pseudomonas*  
601 *stutzeri* A1501. *J. Bacteriol.* **193**, 4456–4468 (2011).
- 602 40. Seip, B., Galinski, E. A. & Kurz, M. Natural and engineered hydroxyectoine  
603 production based on the *Pseudomonas stutzeri* ectABCD-ask gene cluster.  
604 *Appl. Environ. Microbiol.* **77**, 1368–1374 (2011).
- 605 41. Yuvali Celik, G., Aslim, B. & Beyatli, Y. *Enhanced crude oil biodegradation*  
606 *and rhamnolipid production by Pseudomonas stutzeri strain G11 in the*  
607 *presence of Tween-80 and Triton X-100. Journal of environmental biology /*  
608 *Academy of Environmental Biology, India* **29**, (2008).
- 609 42. Singh, D. N. & Tripathi, A. K. Coal induced production of a rhamnolipid  
610 biosurfactant by *Pseudomonas stutzeri*, isolated from the formation water  
611 of Jharia coalbed. *Bioresour. Technol.* **128**, 215–221 (2013).
- 612 43. Soares Dos Santos, A., Pereira, N. J. & Freire, D. M. G. Strategies for  
613 improved rhamnolipid production by *Pseudomonas aeruginosa* PA1. *PeerJ*  
614 **4**, e2078 (2016).
- 615 44. Jirasripongpun, K. The characterization of oil-degrading microorganisms  
616 from lubricating oil contaminated (scale) soil. *Lett. Appl. Microbiol.* **35**, 296–  
617 300 (2002).
- 618 45. Mesle, M., Dromart, G. & Oger, P. Microbial methanogenesis in subsurface  
619 oil and coal. *Res. Microbiol.* **164**, 959–972 (2013).
- 620 46. Myers, C. R. & Nealson, K. H. Bacterial Manganese Reduction and Growth  
621 with Manganese Oxide as the Sole Electron Acceptor. *Science (80- )*. **240**,  
622 1319 LP-1321 (1988).
- 623 47. Sravan Kumar, R. *et al.* *Shewanella fodinae* sp. nov., isolated from a coal  
624 mine and from a marine lagoon. *Int. J. Syst. Evol. Microbiol.* **60**, 1649–  
625 1654 (2010).
- 626 48. Ghosal, D., Ghosh, S., Dutta, T. K. & Ahn, Y. Current State of Knowledge  
627 in Microbial Degradation of Polycyclic Aromatic Hydrocarbons (PAHs): A  
628 Review . *Frontiers in Microbiology* **7**, 1369 (2016).
- 629 49. Poehlein, A. *et al.* An ancient pathway combining carbon dioxide fixation  
630 with the generation and utilization of a sodium ion gradient for ATP  
631 synthesis. *PLoS One* **7**, e33439 (2012).
- 632 50. Nicholson, C. A. & Fathepure, B. Z. Biodegradation of benzene by  
633 halophilic and halotolerant bacteria under aerobic conditions. *Appl.*  
634 *Environ. Microbiol.* **70**, 1222–1225 (2004).

- 635 51. Daly, R. A. *et al.* Microbial metabolisms in a 2.5-km-deep ecosystem  
636 created by hydraulic fracturing in shales. *Nat. Microbiol.* 16146 (2016).  
637 doi:10.1038/nmicrobiol.2016.146  
638 52. Anderson, R. E. *et al.* Genomic variation in microbial populations inhabiting  
639 the marine seafloor at deep-sea hydrothermal vents. *Nat. Commun.* **8**,  
640 (2017).  
641  
642

643 **FIGURES.**

644 **Figure 1. Read-based taxonomy profiling, and geochemistry of eight**  
645 **Appalachian Basin formation water samples.** A) Class-level taxonomy of  
646 coalbed methane metagenomes from Illumina sequencing reads. B) Major ions  
647 found in formation water samples. C) Total number of reads mapping to  
648 hydrocarbon degradation pathways. D) Depth profile of formation water samples.

649  
650 **Figure 2. Assembly-based pan-metagenome analysis and read-based**  
651 **taxonomy of fifteen coalbed methane metagenomes from the Alberta Basin,**  
652 **Appalachian Basin, and San Juan Basin.** Pan-metagenome clustering of  
653 coalbed methane metagenomes, with Bacteria and Archaea read distribution for  
654 Alberta Basin (yellow), Appalachian Basin (black), and San Juan Basin (red).  
655 Numbers on the pan-genome tree represent the number of gene families  
656 common across samples.

657  
658 **Figure 3. Metabolic overview and potential functional coal-to-methane**  
659 **conversion in coalbed methane systems.** Metagenome data suggests two  
660 coalbed regimes; one dominated by hydrocarbon degraders, the other dominated  
661 by methanogens.

662  
663

664  
665  
666

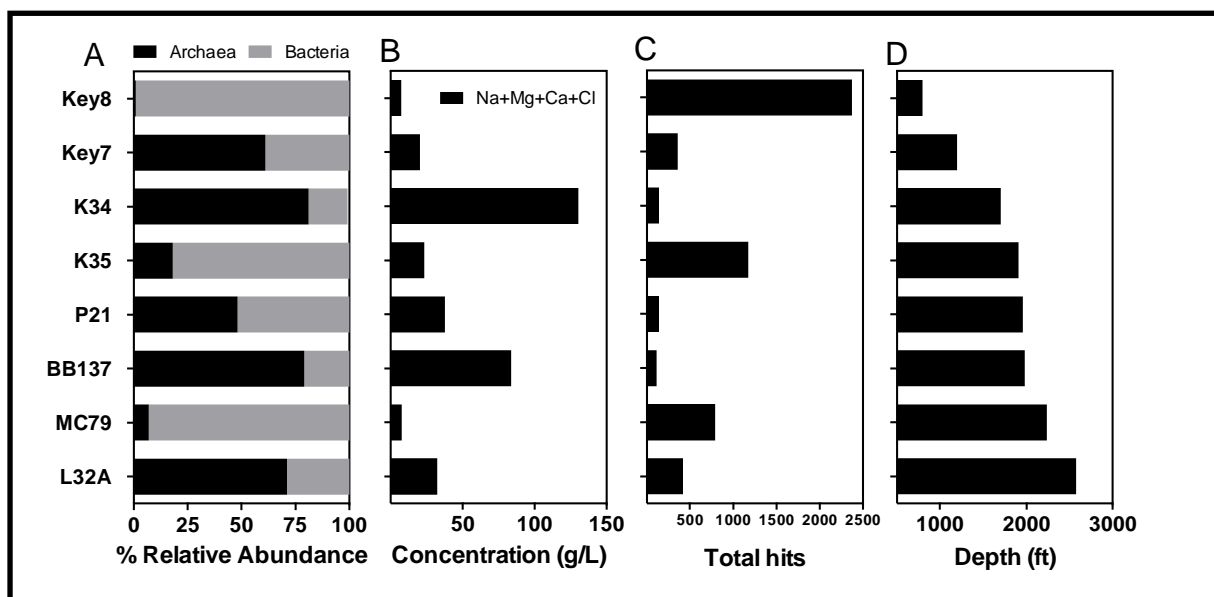

667  
668  
669  
670  
671  
672  
673  
674

**Figure 1. Read-based taxonomy profiling, and geochemistry of eight Appalachian Basin formation water samples.** A) Class-level taxonomy of coalbed methane metagenomes from Illumina sequencing reads. B) Major ions found in formation water samples. C) Total number of reads mapping to hydrocarbon degradation pathways. D) Depth profile of formation water samples.

675

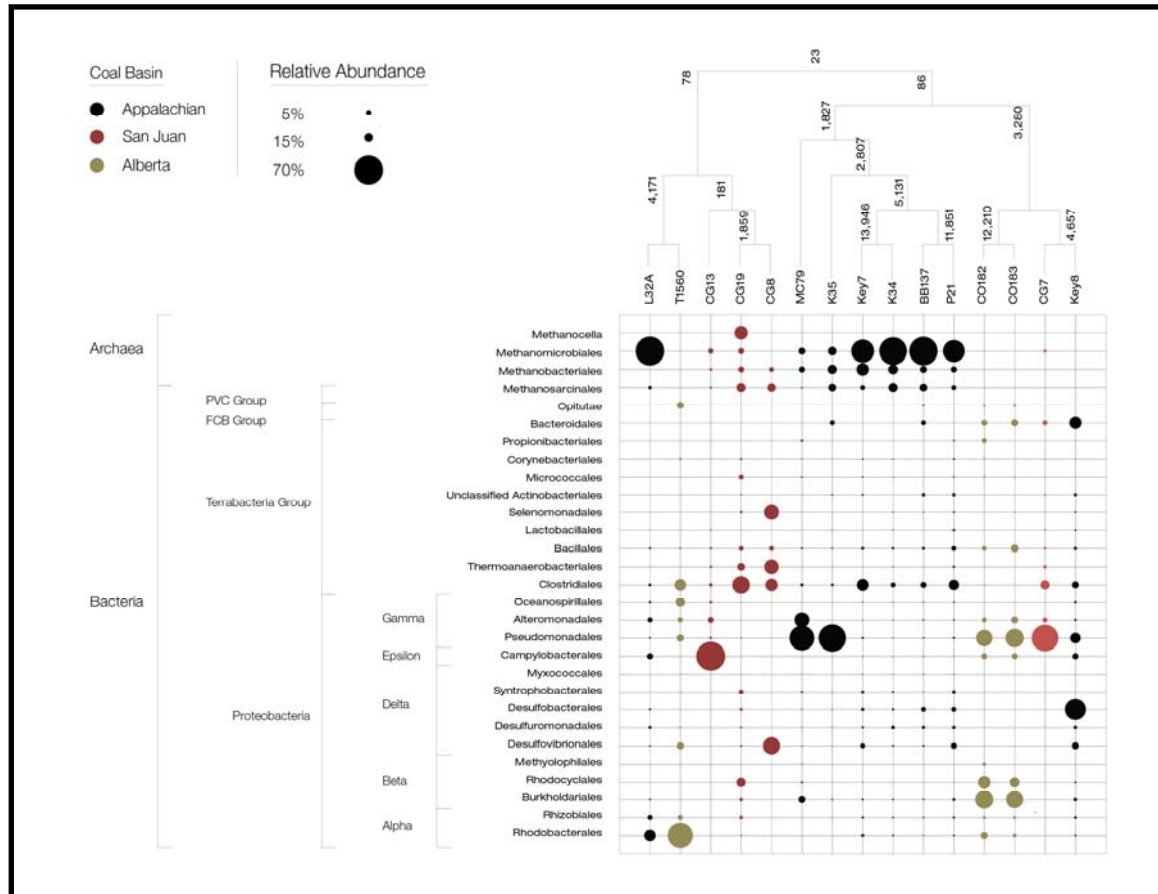

676

677

678

679

680

681

682

683

684

**Figure 2. Assembly-based pan-metagenome analysis and read-based taxonomy of fifteen coalbed methane metagenomes from the Alberta Basin, Appalachian Basin, and San Juan Basin.** Pan-metagenome clustering of coalbed methane metagenomes, with Bacteria and Archaea read distribution for Alberta Basin (yellow), Appalachian Basin (black), and San Juan Basin (red). Numbers on the pan-genome tree represent the number of gene families common across samples.

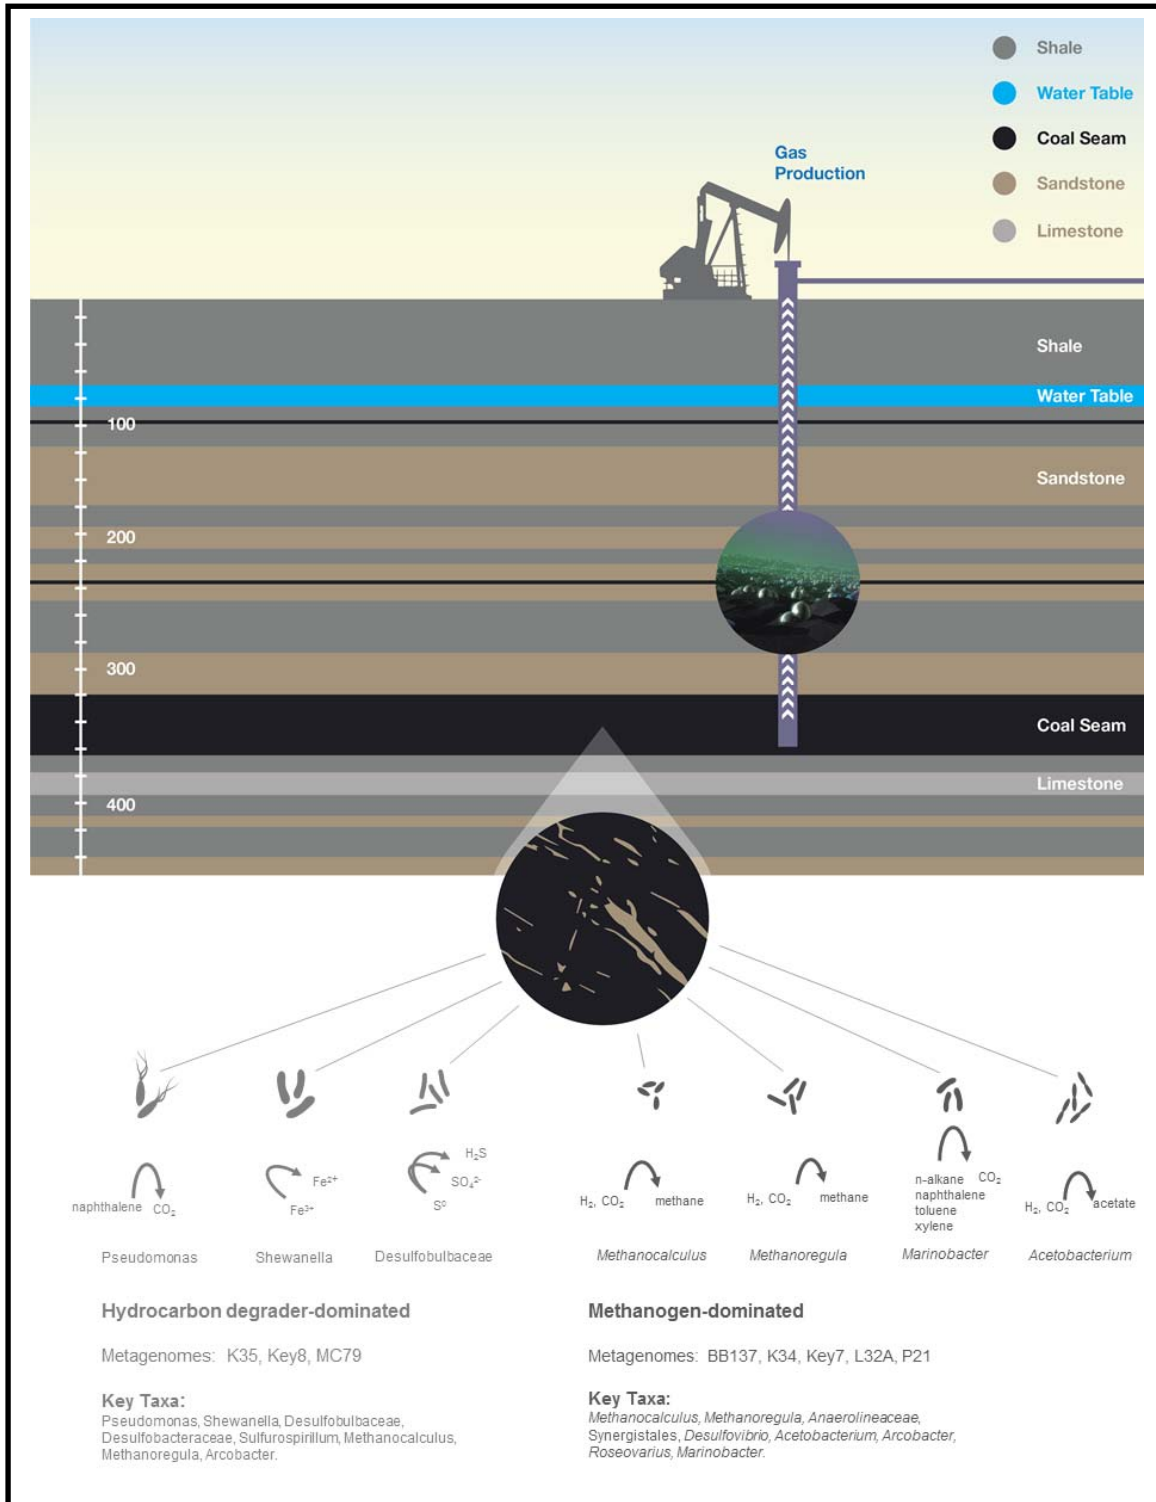

685 **Figure 3. Metabolic overview and potential functional coal-to-methane**  
 686 **conversion in coalbed methane systems.** Metagenome data suggests two  
 687 coalbed regimes; one dominated by hydrocarbon degraders, the other dominated  
 688 by methanogens.
